# Supplementary material for: From future diets to dishes: communicating dietary shift associated with a 1.5°C scenario for Brazil, China, Sweden and the United Kingdom
Source: Frontiers journal article supplement (doi:10.3389/fsufs.2023.1266708), 2023-11-27
Supplement: Data_Sheet_1.pdf [file Data_Sheet_1.pdf]

# **Supplementary Materials for**

## **From Future Diets To Dishes: Communicating Dietary Shift Associated With A 1.5°C Scenario For Brazil, China, Sweden And The UK**

Lee, S.E.<sup>a</sup>, Freer, M.<sup>a</sup>, Wood, R.<sup>a</sup>, Edelenbosch, O.<sup>bc</sup>, Sharmina, M.<sup>a</sup>, van Vuuren, D.<sup>bc</sup>, Wilson, C.<sup>de</sup>,

**This PDF file includes:**

Supplementary Text:

1. Country Analysis
2. Data Validation
3. Food Categorisation
4. FAO Food Supply
5. Household Waste
6. Food consumption calculations for food items
7. Household Waste Quantities
8. Downscaling WEU to UK and Sweden
9. Portion sizes for different food groups
10. Mixed Dishes
11. Primary Meat Dish

**Figures: Supplementary Figures 1 to 5**

**Tables: Supplementary Tables 1 to 11**

**Captions for Supplementary Data files S1 to S7**

**References**

**Other Supplementary Material for this manuscript includes the following:**

**Supplementary data files 1 to 7**

### **1. Country Analysis**

#### **1.1. Brazil**

Brazil is the fifth largest country in the world and is one of the rapidly developing economies in BRIC (Brazil, Russia, India and China). It ranks seventh in terms of its population (1). In 2018, around 30% of the land was agricultural (23% pasture land) and around 60% was forested (1). Methane largely from cattle accounts for a third of Brazil's GHG emissions (2). Meat consumption dominates the Brazilian diet often consumed twice daily for every day of the week. Diets are also high in locally produced fruits and grains (3).

Brazilians traditionally tend to combine foods of plant origin with similar nutrition such as grains and legumes (rice and beans) as well as coarsely ground cassava known as 'grits' with beans. To reflect the traditional way of Brazilian eating, as well as demonstrating how meat consumption is changing in this country, we select several different recipes containing meat, grains and fruit and vegetables. These recipes reflect commonly eaten foods in the country according to a variety of websites and commentators. Supplementary Table 7 lists the Brazilian recipes selected, their ingredients and reference sources. A popular main dish, Feijoada (Brazilian meat and bean stew) (4), was selected to be the basis for a visual representation of the modelled changes in daily food consumption for the protein items in the dish, together with fruit and vegetables and staples. The results are shown in Fig. 2a and 2b. The other dishes selected, reflect the range of diets across Brazil as described by (5) who references studies on Brazilian food eaten for different meals of the day as well as providing ingredients within specific dishes.

#### **1.2. China**

China is the third largest country in the world and is one of the rapidly developing economies in BRIC (Brazil, Russia, India, and China) with the largest population. Around 55% of the land is agricultural of which 42% is pastureland and just over a fifth is forested. Around 10% of China's GHGs are from methane from agriculture (6). There are wide differences between the level of urbanisation across the country and there are regional differences in food culture and diet (7). Plant-derived foods form 83% of the total Chinese food intake and are responsible for 62% of the carbon footprint whereby beef, fish and shellfish accounted for 3% of the intake but 16% to the carbon footprint(7). Group meals are common and little meat is eaten (8). The most popular meat is pork though beef consumption is

increasing in the form of hot pots or steak (9). Supplementary Table 7 lists the Chinese recipes selected, their ingredients and reference sources. A popular main dish, Sweet and Sour Pork (10) was selected to be the basis for a visual representation of the modelled changes in daily food consumption for the protein items in the dish together with pineapple and vegetables and staples. The results are shown in Fig. 2c and 2d. The other dishes selected, reflect the range of diets across China (10-13).

### **1.3. Sweden**

Sweden ranks 58<sup>th</sup> in the world in terms of land area and has a population of around 10 million people (14). Much of the land is forested (around 68%) with a small amount of arable land (6 %). It is a prosperous economy based around natural resources such as timber and mineral ores. Methane emissions are low. Sweden emits 4.6 Million MtCO<sub>2</sub> equivalent which puts it as the 114<sup>th</sup> worst emitter globally (15). Total meat consumption has decreased from the Swedish record level of 88.4 kg per capita in 2016 to 80.1 kg per capita in 2021 (16) which equates to around 775g per person per week. This decrease is attributable to greater awareness of animal husbandry as well as health and environmental sustainability. More meat is however being produced domestically with fewer imports. The Swedes consume many meat-based (beef, and pork sausages) dishes as well as chicken. Fish is also the base for many dishes. They are becoming increasingly aware of environmental issues with meat and a meat guide has been produced to provide an environmental impact assessment (17-19).

The focus of this paper is on the changes in meat consumption so, although there are many types of fish eaten in Sweden, (e.g. salmon and herring) we have extracted recipes on meat (beef, pork, poultry) based dishes (See Supplementary Table 7). The popular main dish, Köttbullar (Swedish meat balls) (20), was selected to be the basis for a visual representation of the modelled changes in daily food consumption for the protein items in the dish together with fruit and vegetables and staples. The results are shown in Fig. 2e and 2f. The other dishes selected, reflect the different protein foods eaten in Sweden (20-22).

### **1.4. UK**

The UK ranks 80<sup>th</sup> in the world in terms of land area and has a population of around 68 million people (23). Around 71% of the land is agricultural with 25% arable land, 46% pastureland and 12% is forested. The UK emits 51.2 Million MtCO<sub>2</sub> equivalent which puts it as the 30<sup>th</sup> worst emitter globally (15). Meat consumption has fallen over the last 10 to 15 years from 103.7 g/capita/day in 2008 to 86.3 g/capita/day (604 g/capita/week) in 2019, specifically in red meat and processed meat, though there has been an increase in white meat consumption over the same period (24). The UK diet was traditionally based on “meat and 2 vegetables” (25) but with foreign travel and the development of a multi-cultural society, the diet is more varied and takes influences from many countries around the World (25). Like many countries across northern Europe, Britain has an obesity problem (26) and there is increasing awareness that meat consumption needs to decrease from a health point of view (27). We have extracted recipes on meat (beef, pork, poultry) based dishes (See Supplementary Table 7 in the SI). The popular main dish, Chicken Korma containing tomato and onion with rice (28, 29), was selected to be the basis for a visual representation of the modelled changes in daily food consumption for the protein items in the dish together with fruit and vegetables and staples. The results are shown in Fig. 2g and 2h. The other dishes selected, reflect the different protein foods eaten in the UK (30, 31).

## **2. Data validation**

Due to the global COVID-19 pandemic, any data for FAO 2020 would be distorted by this event. We therefore use 2019 data as proxy for 2020. Our intention was: i) to assess the total modelled food demand values from IMAGE for 2020 against the FAO 2019 total food supply data and to ensure that the data were quantitatively similar within +/- 15% of each other and ii) to provide a present-day starting point for UK and Sweden.

We extracted the FAO 2019 food supply data for Brazil, China, (t/yr) (FAO, 2021) for each food item and totalled these for each country). We repeated this process for all the WEU countries used within IMAGE, including UK and Sweden (Supplementary Data files 1, 2 and 3). Within WEU there were eight smaller countries (Andorra, Faroe Islands, Gibraltar, Holy See, Liechtenstein, Malta, Monaco, San Marino) for which no FAO data were available. An estimate of their food supply was calculated from their population and the food supply of their nearest neighbouring country. We followed the methods from Bijl et al. (32) to determine the allocation of all the food items in the FAO Food balance sheet. These data were converted to g/cap/day for total food supplied (2459 g/cap/day). Given that the total population of these countries is so small (around 710,000) which equates to 0.6% of the total WEU population, we focussed our analysis on the 18 WEU countries that have FAO food data. The average FAO food supply for all WEU countries is 2397 g/cap/day. This is slightly lower than the modelled IMAGE FD value (inclusive of HH waste) of 2527 g/cap/day, but within 5% of this value (see Supplementary Table 1).

**Supplementary Table 1: FAO Food supply values for 2019 and modelled IMAGE Food demand including household (HH) waste for 2020 for Brazil, China and Western Europe (WEU)**

| Country           | FAO 2019<br>Total food<br>supplied<br>(g/cap/day) | IMAGE 2020<br>Total Food<br>demand incl<br>HH waste)<br>(g/cap/day) | Difference<br>(g/cap/day) | %<br>Difference/Total<br>Food demand |
|-------------------|---------------------------------------------------|---------------------------------------------------------------------|---------------------------|--------------------------------------|
| Brazil            | 2105                                              | 2067                                                                | 38                        | 2                                    |
| China             | 2706                                              | 2406                                                                | 300                       | 11                                   |
| Western<br>Europe | 2397                                              | 2527                                                                | -130                      | -5                                   |

The total food supplied for Brazil (2105 g/cap/day) was close to the LiStCh data for Brazil (2067 g/cap/day) and within the 15% threshold for China (LiStCh value of 2406 g/cap/day) (Supplementary Table 1) which was deemed acceptable given the unknowns within the actual data as to the amount of wastage. Our main interest is the distribution of the main food groups and the specific protein food items within these groups.

### 3. Food categorization

**Supplementary Table 2: Food categorizations used in this paper (column 1) and by FAO (33) (32) and (34) within the IMAGE model 1.5 °C lifestyle scenario, and the corresponding FAO FBS food item categories.**

| Food group as used for Tables 1, 2, Supplementary Table 8 to 11; Supplementary Figure 1a-f; supplementary data files 1 to 4 | FAO Food Item (33)      | IMAGE Food items outputs (32) | Household Waste Food categories (32, 34) |
|-----------------------------------------------------------------------------------------------------------------------------|-------------------------|-------------------------------|------------------------------------------|
| Beef                                                                                                                        | Bovine meat             | Cattle meat                   | Animal                                   |
| Dairy                                                                                                                       | Butter, Ghee            | Butter and cream              | Animal                                   |
|                                                                                                                             | Cream                   |                               |                                          |
|                                                                                                                             | Milk - Excluding Butter | Milk                          |                                          |
| Pork                                                                                                                        | Pigmeat                 | Pig meat                      | Animal                                   |
| Lamb                                                                                                                        | Mutton and goat meat    | Sheep and goat meat           |                                          |
| Eggs                                                                                                                        | Eggs                    | Eggs                          |                                          |
| Poultry                                                                                                                     | Poultry meat            | Poultry meat                  |                                          |
| Fish and seafood                                                                                                            | Freshwater Fish         | Fish and seafood              | Animal                                   |
|                                                                                                                             | Demersal Fish           |                               |                                          |
|                                                                                                                             | Pelagic Fish            |                               |                                          |
|                                                                                                                             | Marine Fish, Other      |                               |                                          |
|                                                                                                                             | Crustaceans             |                               |                                          |
|                                                                                                                             | Cephalopods             |                               |                                          |
|                                                                                                                             | Molluscs, Other         |                               |                                          |

|                           |                                    |                           |                      |
|---------------------------|------------------------------------|---------------------------|----------------------|
| other meat and animal fat | Meat, Other                        | Other meat and animal fat | Animal               |
|                           | Offals, Edible                     |                           |                      |
|                           | Fats, Animals, Raw                 |                           |                      |
|                           | Fish, Body Oil                     |                           |                      |
| Nuts and seeds            | Sunflower seed                     | Sunflower seed            | Oils and oilcrops    |
|                           | Sesame seed                        | Sesame seed               |                      |
|                           | Groundnuts                         | Groundnuts                |                      |
|                           | Nuts <sup>(1)</sup>                | Nuts <sup>(1)</sup>       | Fruit and vegetables |
| Pulses                    | Beans                              | Pulses                    | Pulses               |
|                           | Peas                               |                           |                      |
|                           | Pulses, Other and products         |                           |                      |
| Soyabeans                 | soyabeans                          | oils and oilcrops         | Oils and oilcrops    |
| <b>Food group</b>         |                                    |                           |                      |
| Fruit and Vegetables      | Aquatic plants                     | Aquatic plants            | Fruit and vegetables |
|                           | Fruits <sup>(2)</sup>              | Fruits                    |                      |
|                           | Grapes and products excluding wine | Grapes                    |                      |
|                           | Vegetables <sup>(3)</sup>          | Vegetables                |                      |
| Luxuries                  | Beer                               | Luxuries                  | Luxuries             |
|                           | Wine                               |                           |                      |
|                           | other alcohol                      |                           |                      |
|                           | Spices                             |                           |                      |
|                           | Stimulants                         |                           |                      |
|                           | sugar beet                         |                           |                      |
|                           | sugar cane                         |                           |                      |
|                           | sugar raw                          |                           |                      |
|                           | sugar other                        |                           |                      |
| Staples                   | Plantains                          | Plantains                 | Staples              |
|                           | Temperate cereals                  | Temperate cereals         |                      |
|                           | Barley                             | Barley                    |                      |
|                           | Rice (milled eq)                   | Rice (milled eq)          |                      |
|                           | Maize                              | Maize                     |                      |
|                           | Tropical cereals                   | Tropical cereals          |                      |
|                           | Roots and tubers                   | Roots and tubers          |                      |

<sup>(1)</sup> Tree nuts

(2) Not listed all fruits in FAO (FAO Item group: 2919) (10 in total excluding grapes)

(3) Not listed all vegetables in FAO (FAO Item group: 2918) (3 in total)

#### 4. FAO Food supply

We are following on from the work carried out by Bijl and colleagues on their Food Demand model (32). We are assuming that the food supplied to a population will reflect the food consumed by that population, and that there will be waste in transporting and delivering (distribution waste) as well as waste in the household before the food is consumed. “Food availability” as defined in the Food Balance Sheet (FBS setting)(33) refers to the quantities of food available for human consumption at the retail level by the country’s resident population. Food availability also includes any loss or waste at the retail or consumer level. For this reason, total food availability estimates derived from the FBS are likely to be higher than actual average food consumption(35). Bijl et al. (32) calculated household waste, and the food demand data includes this component. This is included in the IMAGE Food demand data. FAO food supply is equivalent to IMAGE Food Demand including household (HH) waste.

#### 5. Household Waste (HW)

The data within IMAGE is of food demand (potential future use) including household waste (in effect, food supply) together with household waste for each of the main food categories. To calculate this household waste, Bijl et al (32) adopted the life-cycle analysis approach used by (36) whereby they assumed at each stage of the supply chain and for each food category the lowest waste fraction achieved by any region can be achieved by all other regions. This approach was used within (34). Food waste as a fraction of total demand is reduced in households (10% less avoidable waste per year starting in 2011, reaching 98% reduction in 2050), and in storage and distribution systems (5% less waste per year starting in 2011, reaching 86% in 2050). The modelled IMAGE household waste data are available for each food category.

#### 6. Food consumption calculations for food items

For each of the four countries, food consumption (FC) was calculated for each decade: 2020, 2030, 2040 and 2050 by using IMAGE food demand including household waste (FD) and IMAGE household waste (HW) data calculated by (32) for each of the six main food categories (see Supplementary Table 2) . To determine the household waste for selected items within these categories we used the percentage of household waste of total FD for the main category (equation (2)) and applied it to each food item in that category for each decade to determine HW for each food item. Finally, to determine food consumption for all the food items and food groups of interest we used equation (4).

The following equation (1) shows the calculation of food consumption for the food category: *Animal* (FC(A)):

$$FC(A) = (FD (A)) - (HW (A)) \quad (1)$$

#### Key: Food category (cat)

| Cat | Food category     |
|-----|-------------------|
| A   | Animal            |
| FV  | Fruit and Veg     |
| LX  | Luxuries          |
| OC  | Oils and oilcrops |
| P   | Pulses            |
| S   | Staples           |

#### Calculation of HH waste percentage for each food category

$$HW (cat) \% = (HW (cat)) / (FD (cat)) * 100 \quad (2)$$

repeated for each category

**Calculation of HH waste percentage for each food item (FI) within the appropriate food category**

$$HW (FI) = HW (cat) \% * FD (FI) \quad (3)$$

**Calculation of food consumption for each food item**

$$FC (FI) = FD (FI) - HW (FI) \quad (4)$$

This was repeated for all food items within their food category (see Supplementary Table 2)

## 7. Household Waste Quantities

**Supplementary Table 4a: IMAGE Household Waste (g/cap/day) 2020 for Brazil, China, Sweden (calculated) and UK (calculated) See Extended data files 2 to 4 for individual food items for UK and Sweden**

| Region\Food category  | HH Waste Brazil (g/cap/day) | HH Waste China (g/cap/day) | WEU                                  |                                          |
|-----------------------|-----------------------------|----------------------------|--------------------------------------|------------------------------------------|
|                       |                             |                            | HH Waste UK (calculated) (g/cap/day) | HH Waste Sweden (calculated) (g/cap/day) |
| Animal                | 20                          | 18                         | 46                                   | 46                                       |
| Fruits and vegetables | 32                          | 87                         | 42                                   | 38                                       |
| Luxuries              | 6                           | 2                          | 6                                    | 6                                        |
| Oils and oilcrops     | 1                           | 0                          | 1                                    | 0                                        |
| Pulses                | 1                           | 0                          | 0                                    | 0                                        |
| Staples               | 23                          | 39                         | 48                                   | 38                                       |
| <b>Total</b>          | 82                          | 146                        | 143                                  | 129                                      |

**Supplementary Table 4b: IMAGE Household Waste (g/cap/day) 2050 for Brazil, China, Sweden (calculated) and UK (calculated) See Extended data files 1 to 4 for individual food items (See Extended Data files 1 to 4 for individual food items)**

| Region\Food category | Brazil | China | WEU             |                     |
|----------------------|--------|-------|-----------------|---------------------|
|                      |        |       | UK (calculated) | Sweden (calculated) |

|                       |           |           |           |           |
|-----------------------|-----------|-----------|-----------|-----------|
| Animal                | 3         | 2         | 10        | 10        |
| Fruits and vegetables | 21        | 53        | 24        | 24        |
| Luxuries              | 2         | 0         | 1         | 1         |
| Oils and oilcrops     | 1         | 1         | 1         | 1         |
| Pulses                | 2         | 0         | 1         | 1         |
| Staples               | 6         | 9         | 10        | 10        |
| <b>Total</b>          | <b>34</b> | <b>65</b> | <b>47</b> | <b>47</b> |

## 8. Downscaling WEU to UK and Sweden

The available data from IMAGE gives food demand for Western Europe. Before establishing the baseline for the UK and Sweden we downscale the 2020 LiStCh data to the UK (Supplementary Data file 3) and Sweden (Supplementary Data file 2) using the ratios of UK and Swedish food supply to the total for Western Europe from the FAO 2019 Food Supply (33).

Once the baseline was established, we then apply the changes associated with the LiStCh scenario to give g/cap/annum for each food category and protein food item. For Brazil and China the LiStCh was used directly. For UK and Sweden, the scenario states by 2050 that diets converge, hence a linear trajectory of food demand changes from 2020 to converge on the 2050 Western Europe LiStCh food demand was applied. Once the food demand has been calculated for each decade, calculated HH waste was deducted to determine a food consumption value. The HH waste calculated for UK and Sweden used the percentage values from IMAGE Western Europe for 2020 shown in Supplementary Table 3a and Supplementary Table 3b respectively and for 2050 in Supplementary Table 4a and Supplementary Table 4b respectively. Note by 2050 UK and Sweden have the same HH waste values that are consistent with the regional changes in Western Europe.

**Supplementary Table 3a: Calculated IMAGE UK 2020 Food consumption for the LiStCh scenario for the six food categories See Supplementary Table 2 above and Supplementary Data File 2 for individual food items**

**UK**

| <b>Food category</b> | <b>UK/WEU FAO 2019</b> | <b>IMAGE UK FD 2020 calculated (g/cap/day)</b> | <b>IMAGE 2020 (HH Waste)/ IMAGE 2020 FD (%)</b> | <b>Calculated UK 2020 HH Waste (g/cap/day)</b> | <b>Calculated IMAGE UK 2020 FC (g/cap/day)</b> |
|----------------------|------------------------|------------------------------------------------|-------------------------------------------------|------------------------------------------------|------------------------------------------------|
| Animal               | 1.00                   | 1039                                           | 4                                               | 46                                             | 993                                            |
| Fruit and Veg        | 0.83                   | 492                                            | 8                                               | 42                                             | 450                                            |
| Luxuries             | 1.01                   | 403                                            | 2                                               | 6                                              | 397                                            |
| Oils and oilcrops    | 0.77                   | 30                                             | 2                                               | 1                                              | 29                                             |
| Pulses               | 1.01                   | 7                                              | 2                                               | 0                                              | 7                                              |
| Staples              | 1.11                   | 500                                            | 10                                              | 48                                             | 452                                            |
| <b>Total</b>         |                        | 2471                                           | 28                                              | 143                                            | 2328                                           |

**Supplementary Table 3b: Calculated IMAGE Sweden 2020 Food consumption for the LiStCh scenario See Table Supplementary Table 2 above and Supplementary Data File 1 for individual food items**

**Sweden**

| <b>Food category</b> | <b>Sweden/WEU FAO 2019</b> | <b>IMAGE Sweden FD 2020 calculated (g/cap/day)</b> | <b>IMAGE 2020 (HH Waste)/ IMAGE 2020 FD (%)</b> | <b>Calculated Sweden 2020 HH Waste (g/cap/day)</b> | <b>Calculated IMAGE Sweden 2020 FC (g/cap/day)</b> |
|----------------------|----------------------------|----------------------------------------------------|-------------------------------------------------|----------------------------------------------------|----------------------------------------------------|
| Animal               | 0.99                       | 1034                                               | 4                                               | 46                                                 | 988                                                |
| Fruit and Veg        | 0.76                       | 448                                                | 8                                               | 38                                                 | 410                                                |
| Luxuries             | 1.01                       | 400                                                | 2                                               | 6                                                  | 394                                                |
| Oils and oilcrops    | 0.47                       | 18                                                 | 2                                               | 0                                                  | 18                                                 |
| Pulses               | 0.60                       | 4                                                  | 2                                               | 0                                                  | 4                                                  |
| Staples              | 0.87                       | 394                                                | 10                                              | 38                                                 | 356                                                |
| <b>Total</b>         |                            | 2298                                               | 28                                              | 129                                                | 2169                                               |



## 9. Portion sizes for different food groups

Each country has the same portion of meat, fruit and vegetable, and staples. These are based on amounts used in recipes and from the BNF (37)

**Supplementary Table 5:** Portion sizes (g) for different food types

| Food group                                             | Portion (g) |
|--------------------------------------------------------|-------------|
| Meat                                                   | 100         |
| Dairy (milk on cereal or yoghurt)                      | 125         |
| Egg                                                    | 60          |
| Fish                                                   | 120         |
| Other meat and animal fat (mostly offal)               | 100         |
| Fruit and vegetables                                   | 80          |
| Oils and oilcrops (1 tablespoon of vegetable oil)      | 15          |
| Luxuries – chocolate (4 squares/5 teaspoons of sugar)) | 20          |
| Staples (dry weight)                                   | 75          |
| Pulses (lentils)                                       | 50          |
| Nuts and seeds                                         | 20          |
| Soyabean (tofu)                                        | 80          |

## 10. Mixed Dishes

Supplementary Table 7 shows the popular dishes (mixed, primary meat and vegetarian dish) selected by country.

**Supplementary Table 7: Popular Dishes by country**

| Country       | Dishes                                                               | Dish type | Dish Ingredients by food category          |                                            |                      | Reference                                                       |
|---------------|----------------------------------------------------------------------|-----------|--------------------------------------------|--------------------------------------------|----------------------|-----------------------------------------------------------------|
|               |                                                                      |           | Protein                                    | Fruit and Vegetables                       | Staples              |                                                                 |
| <b>Brazil</b> |                                                                      |           |                                            |                                            |                      |                                                                 |
|               | <b>Feijoada<br/>(Brazilian meat stew)</b>                            | MD        | Beef<br>Pork<br>Black beans                | Tomato salsa<br>Collard beans              | Rice                 | (4)<br>Replacement by more beans, sweet potato, black-eyed peas |
|               | Galinha Ensopada<br>(Stewed Chicken)                                 | MD        | Chicken<br>Beans                           | Onion                                      | Rice, Potato         | (38)                                                            |
|               | Feijão Tropeiro<br>(Brazilian Beans with Sausage and Collard Greens) | MD        | carioca beans,<br>calabresa sausage, bacon | Onion, Garlic                              | Flour                | (39)                                                            |
|               | Baked chicken leg with salad                                         | S         | Chicken                                    | Lettuce, tomato, cucumber and onion        | Rice                 | (40)                                                            |
|               | Churrasco Barbequed beef                                             | S         | Beef                                       | Salad                                      | Rice                 | (41)                                                            |
|               | Vegetarian Feijoada                                                  | V         | Black beans                                | Pepper, Onion, kale                        | Rice<br>Sweet potato | (42)                                                            |
| <b>China</b>  |                                                                      |           |                                            |                                            |                      |                                                                 |
|               | <b>Sweet and sour pork</b>                                           | MD        | Pork                                       | Pineapple, Red and green peppers, Onions   | Rice                 | (10)<br>Replacement by tofu                                     |
|               | Kung Pao Chicken                                                     | MD        | Chicken<br>Peanuts                         | Onion<br>Garlic<br>Snow peas<br>Red Pepper |                      | (11)NB For vegetarian version can substitute tofu for chicken   |
|               | Hot Pot                                                              | MD        | Beef                                       | Onions<br>Turnips                          |                      | (12)                                                            |

|               |                                        |    |                  |                                        |                                |                                          |
|---------------|----------------------------------------|----|------------------|----------------------------------------|--------------------------------|------------------------------------------|
|               |                                        |    |                  | Carrots<br>Spinach                     |                                |                                          |
|               | Peking Roast Duck                      | S  | Duck             | Spring onions                          | Pancakes                       | (13)                                     |
|               | Crispy orange beef                     | S  | Beef             | Orange, Onions, Broccoli               | Rice                           | (43)                                     |
|               | Fried Tofu and vegetables              | V  | Tofu             | Onions, carrots, pepper, garlic        | Rice                           | (44)                                     |
| <b>Sweden</b> |                                        |    |                  |                                        |                                |                                          |
|               | <b>Köttbuller (Meat Balls)</b>         | MD | Beef<br>Pork     | Green beans                            | Potato                         | (20) Replaced by lentils, nuts and seeds |
|               | Swedish Kalops (stew)                  | MD | Beef             | Onions<br>Garlic<br>Carrots<br>Berries | Potato                         | (21)                                     |
|               | Sausage stroganoff (Korvstroganoff)    | MD | Pork             | Onion, Tomatoes                        | Rice                           | (45)                                     |
|               | Swedish Chicken with Mushrooms & Cream | S  | Chicken          | Mushroom<br>Beetroot                   | Potato                         | (46)                                     |
|               | Steak on a plank (Plankstek)           | S  | Beef             | Asparagus<br>Tomatoes                  | Potato                         | (47)                                     |
|               | Lentil and Mushroom Meatballs          | V  | Lentil           | Mushrooms                              | Pasta                          | (22)                                     |
| <b>UK</b>     |                                        |    |                  |                                        |                                |                                          |
|               | <b>Chicken Korma</b>                   | MD | Chicken          | Tomatoes<br>Onions<br>Garlic           | Rice                           | (28, 29)                                 |
|               | Spaghetti Bolognese                    | MD | Beef mince       | Tomatoes and onions                    | Pasta                          | (48)                                     |
|               | Full English                           | MD | Pork, Egg, Beans | Tomato<br>Mushrooms                    | Toast                          | (49)                                     |
|               | Roast Beef                             | S  | Slice of Beef    | Broccoli and carrots                   | Yorkshire pudding and potatoes | (50-52)                                  |
|               | Roast Chicken                          | S  | Slice of chicken | Broccoli and carrots                   | Potatoes                       | (53)                                     |

|  |                                      |   |       |                        |       |      |
|--|--------------------------------------|---|-------|------------------------|-------|------|
|  | Vegetarian<br>Spaghetti<br>Bolognese | V | Beans | Tomatoes<br>and onions | Pasta | (54) |
|--|--------------------------------------|---|-------|------------------------|-------|------|

**MD: Mixed dish; V: Vegetarian dish; S – Primary meat dish**

## 11. Primary meat dish

The following charts show how the monthly frequency of protein food items consumed within different popular and traditional dishes change between 2020 and 2030 and up to 2050 for each country.

**Supplementary Figures: Bar charts of changes for different popular food items for each country – selection of meats**

a) Beef; b) Pork c) Poultry d) Pulses e) Soybeans f) Nuts and seeds g) Fish h) Eggs

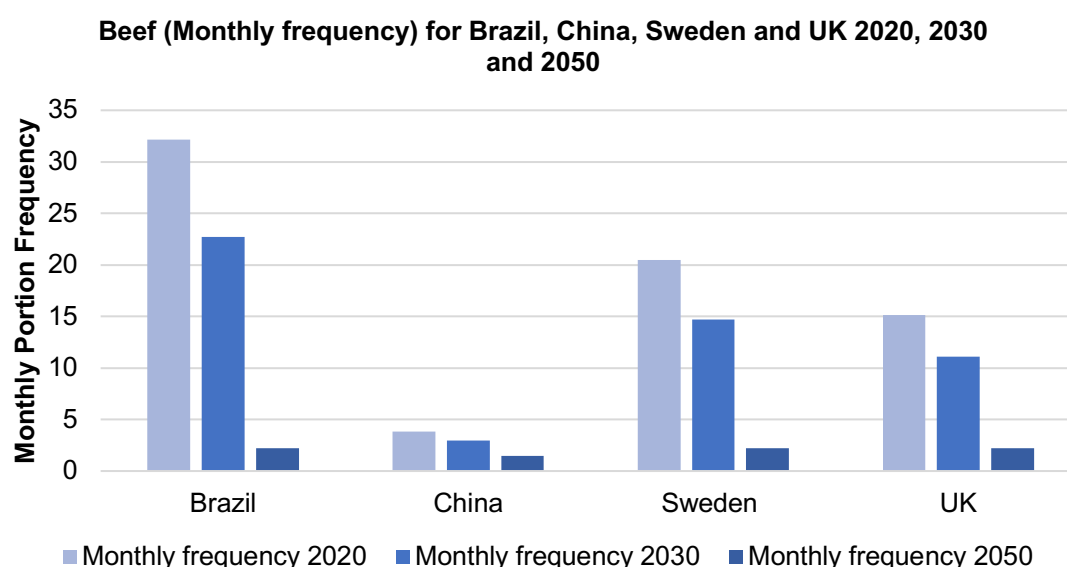

**Supplementary Figure 1a: Monthly frequency of beef consumption for Brazil, China, Sweden and UK (2020, 2030, 2050)**

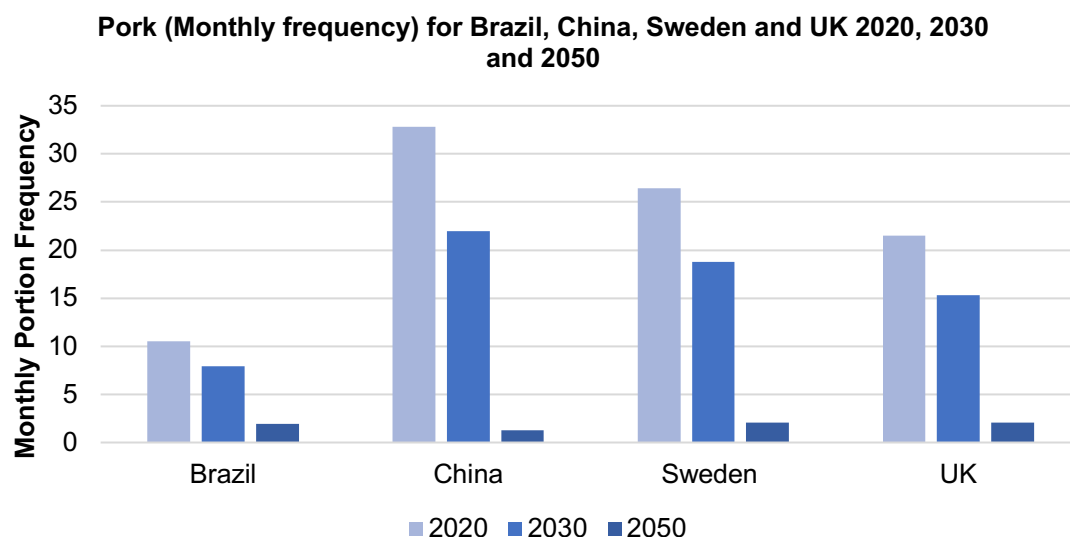

**Supplementary Figure 1b: Monthly frequency of pork consumption for Brazil, China, Sweden and UK (2020, 2030, 2050)**

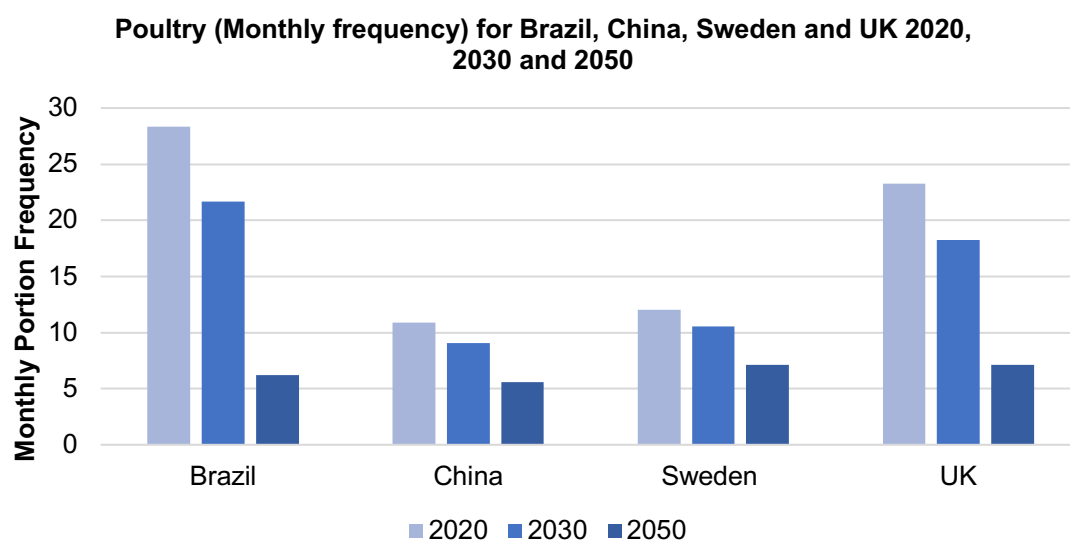

**Supplementary Figure 1c: Monthly frequency of poultry consumption for Brazil, China, Sweden and UK (2020, 2030, 2050)**

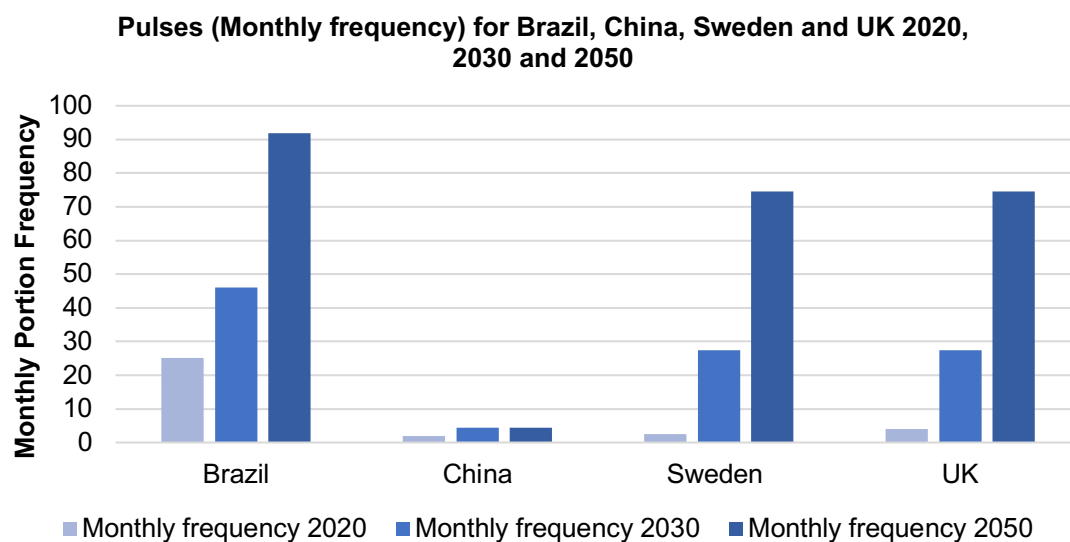

**Supplementary Figure 1d: Monthly frequency of pulses consumption for Brazil, China, Sweden and UK (2020, 2030, 2050)**

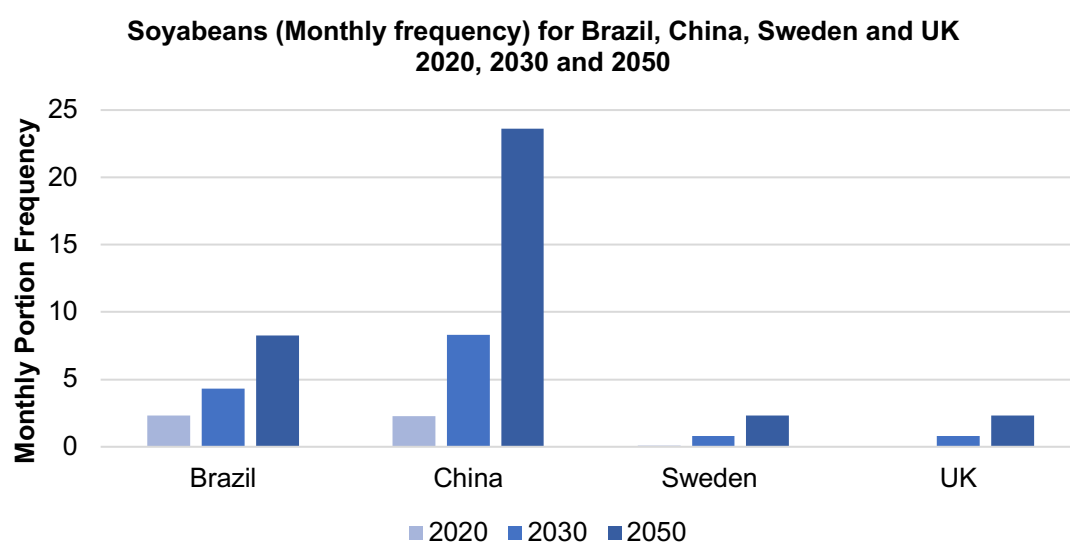

**Supplementary Figure 1e: Monthly frequency of soyabeans consumption for Brazil, China, Sweden and UK (2020, 2030, 2050)**

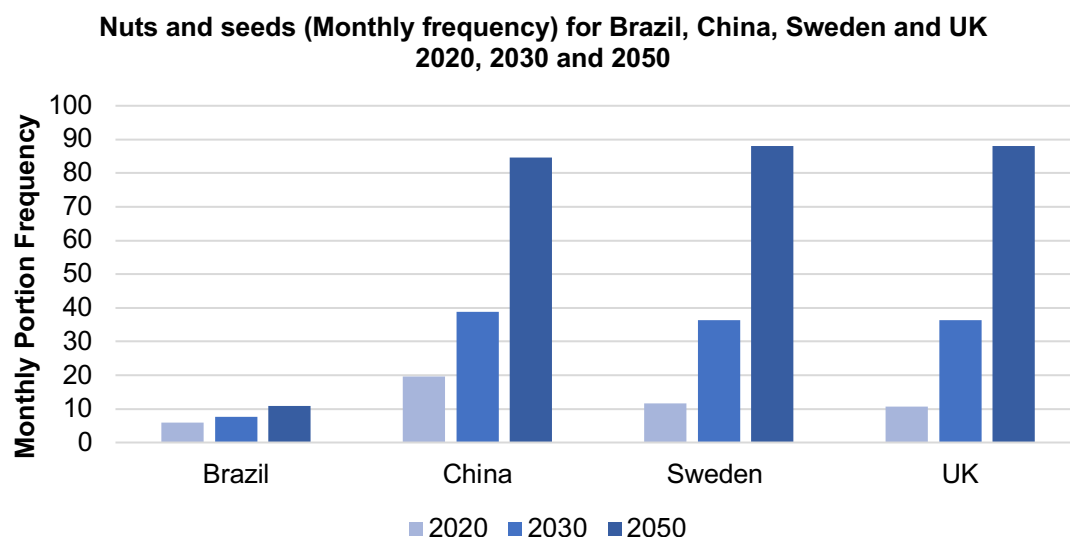

**Supplementary Figure 1f: Monthly frequency of nuts and seeds consumption for Brazil, China, Sweden and UK (2020, 2030, 2050)**

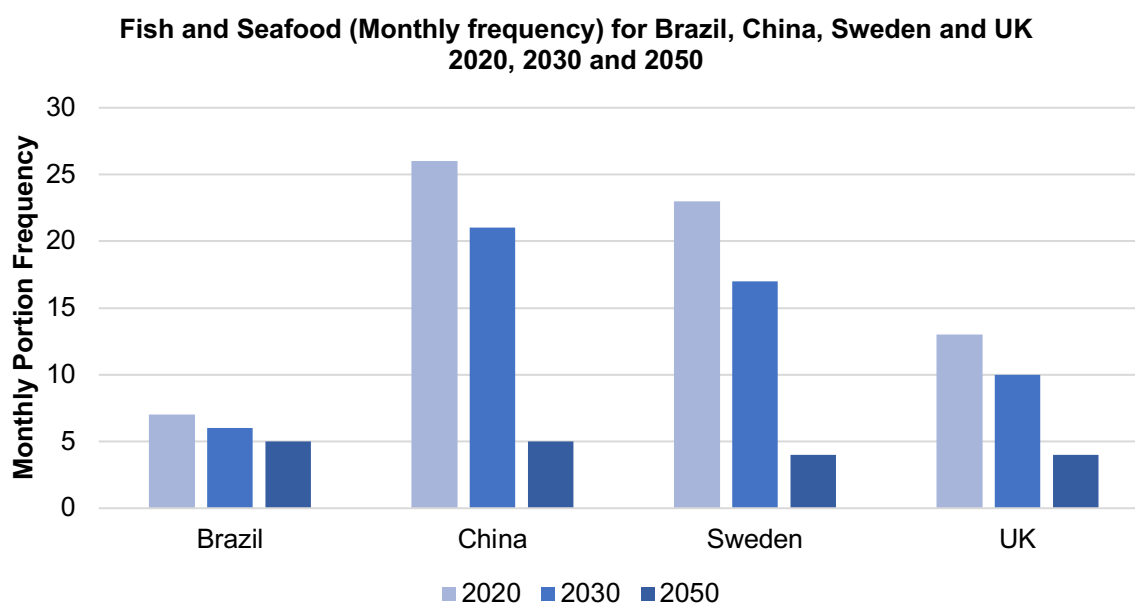

**Supplementary Figure 1g: Monthly frequency of fish and seafood consumption for Brazil, China, Sweden and UK (2020, 2030, 2050)**

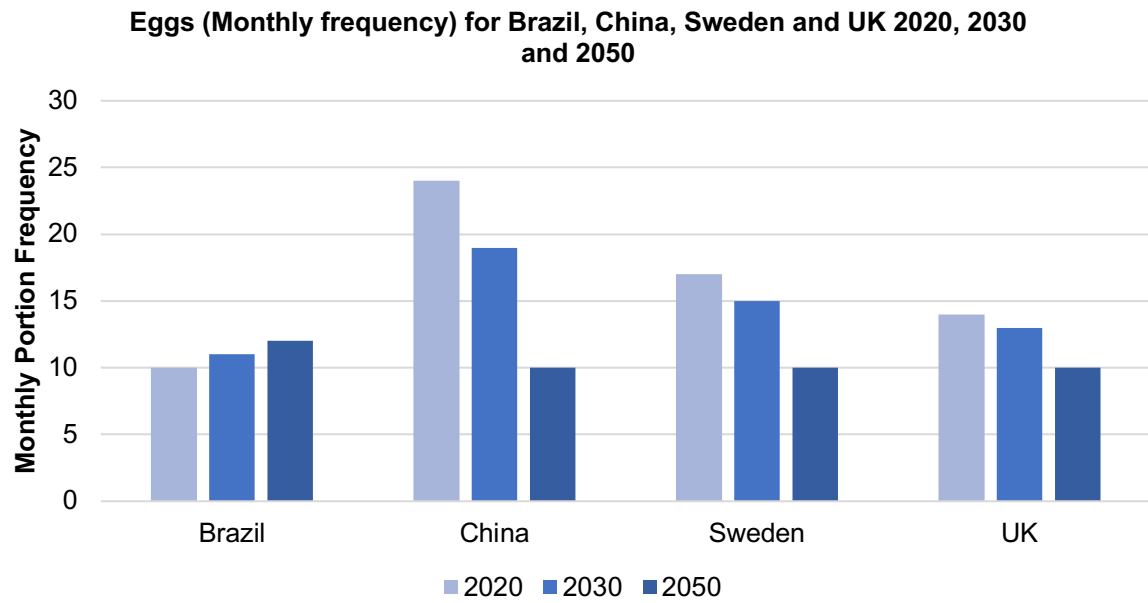

**Supplementary Figure 1h: Monthly frequency of egg consumption for Brazil, China, Sweden and UK (2020, 2030, 2050)**



## 12. Mixed Dishes

### 12.1. Mixed Dish calculations

To determine the projected amount of a particular recipe food item for 2030 and 2050, we extracted the IMAGE modelled daily food consumption (g/cap/day) for 2020, 2030 and 2050 for each country from the Supplementary data files 1 to 4. These data were then plotted on a pie chart which formed the basis for the illustrations of the changes in the dishes in the period 2020 to 2050. See Figures 2 to 5 in the main paper

A selection of different recipes is shown to highlight the dietary change for each country as it moves towards a healthier and more sustainable diet.

### 12.2. Brazil

**Supplementary Table 8: Brazilian Feijoada ingredient changes 2020 to 2050 based on national food consumption (g/cap/day)**

| Recipe: Feijoada | Amount (g) | 2030 Amount (g) calculated | 2050 Amount (g) calculated |
|------------------|------------|----------------------------|----------------------------|
| Beef             | 106        | 75                         | 7                          |
| Pork             | 35         | 26                         | 6                          |
| Pulses           | 41         | 76                         | 151                        |
| Nuts and seeds   | 4          | 5                          | 7                          |
| Fruit and Veg    | 476        | 517                        | 577                        |
| Staples          | 406        | 391                        | 354                        |
| Total            | 10744      | 1101                       | 1124                       |

**Feijoada 2020**

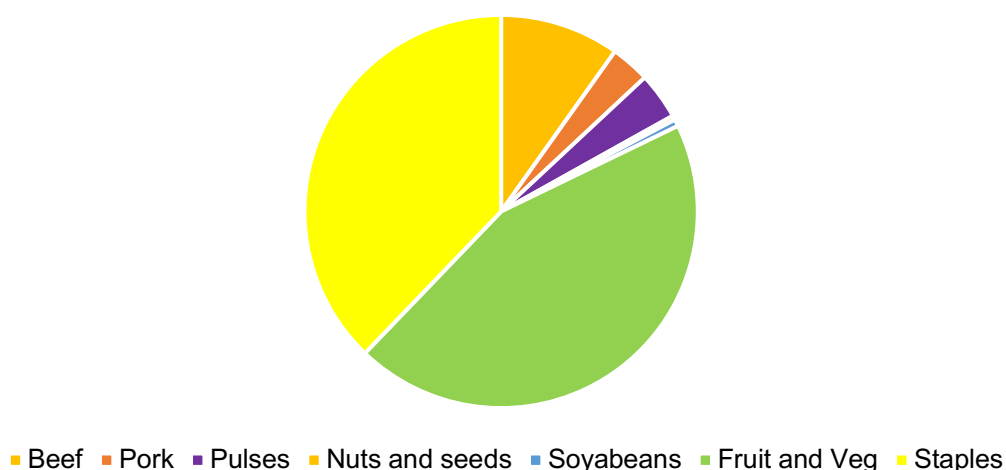

**Supplementary Figure 2a: Brazilian Feijoada 2020 protein food items based on national food consumption**

**Feijoada 2030**

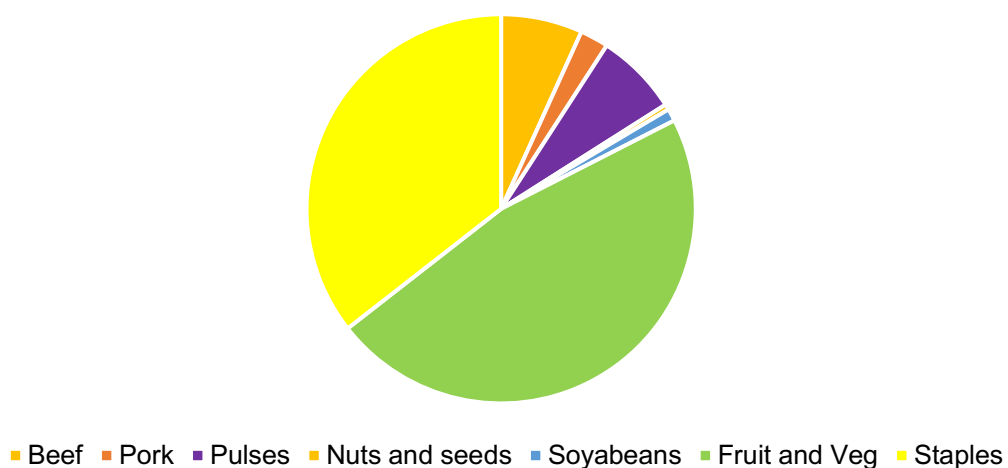

**Supplementary Figure 2b: Brazilian Feijoada 2030 protein food items based on national food consumption**

**Feijoada 2050**

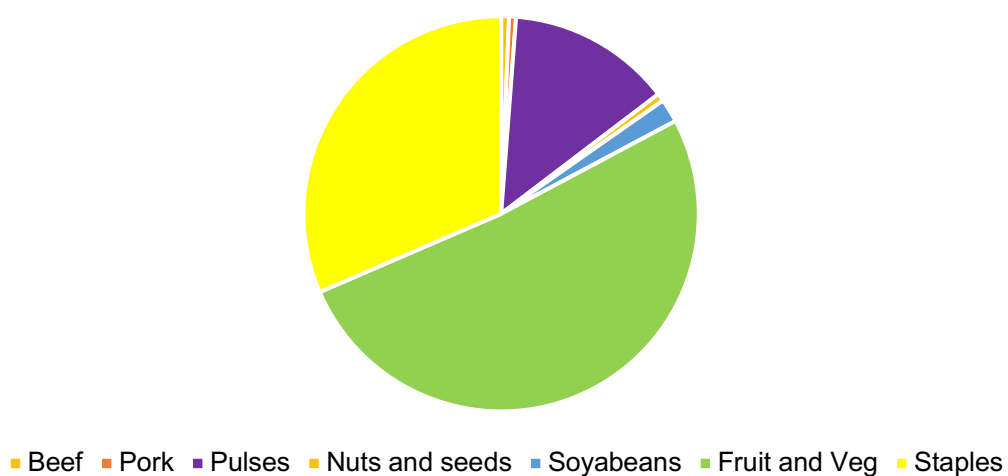

**Supplementary Figure 2c: Brazilian Feijoada 2050 protein food items based on national food consumption**

12.3. China

**Supplementary Table 9: Chinese Sweet and Sour Pork ingredient changes 2020 to 2050 based on national food consumption (g/cap/day)**

| Recipe: Sweet and sour pork | Amount (g) | 2030 Amount (g) calculated | 2050 Amount (g) calculated |
|-----------------------------|------------|----------------------------|----------------------------|
| Pork                        | 108        | 72                         | 4                          |
| Pulses                      | 3          | 7                          | 7                          |
| Nuts and seeds              | 13         | 26                         | 56                         |
| Soyabean curd               | 6          | 22                         | 62                         |
| Fruit and veg               | 1175       | 1282                       | 1391                       |
| Rice                        | 501        | 481                        | 468                        |
| Total                       | 1805       | 1890                       | 1987                       |

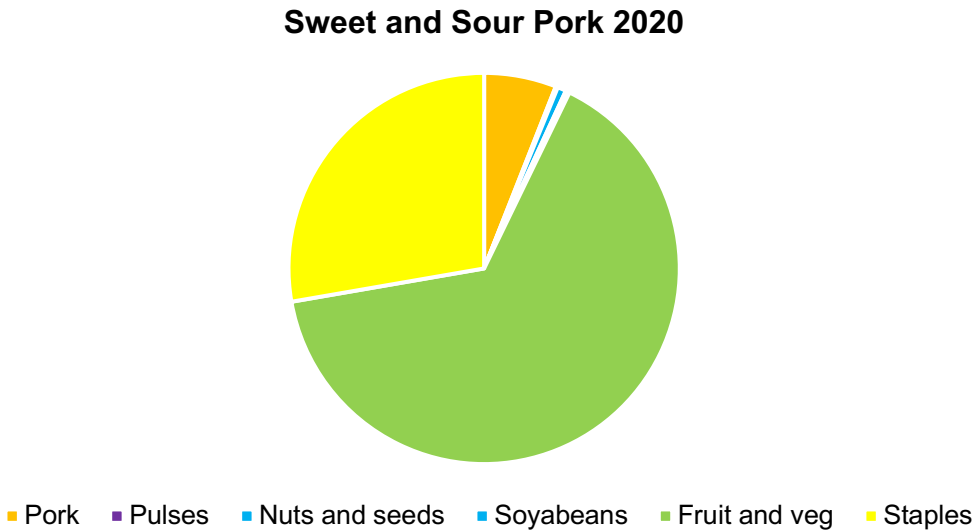

**Supplementary Figure 3a: Chinese sweet and sour pork 2020 protein food items based on national food consumption**

### Sweet and Sour Pork 2030

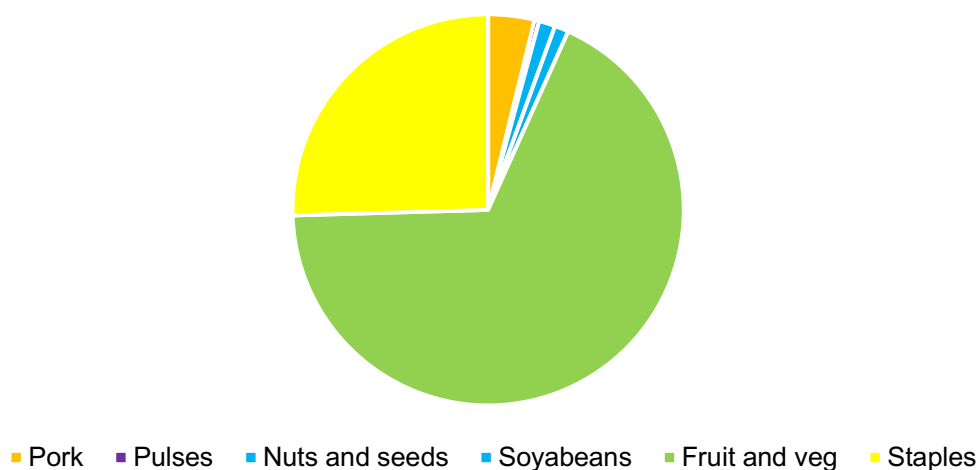

**Supplementary Figure 3b: Chinese sweet and sour pork 2030 protein food items based on national food consumption**

### Sweet and Sour Pork 2050

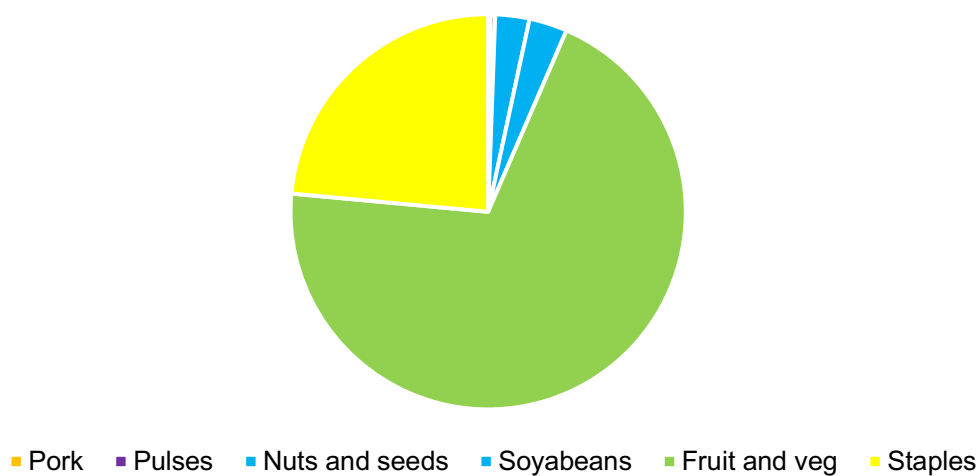

**Supplementary Figure 3c: Chinese sweet and sour pork 2050 protein food items based on national food consumption**

#### 12.4. Sweden

**Supplementary Table 10: Swedish meatballs (Köttbullar) ingredient changes 2020 to 2050 based on national food consumption (g/cap/day)**

| Recipe:<br>Swedish<br>meatballs | Amount (g) | 2030 Amount (g)<br>calculated | 2050 Amount<br>(g) calculated |
|---------------------------------|------------|-------------------------------|-------------------------------|
| Beef                            | 67         | 48                            | 7                             |
| Pork                            | 87         | 62                            | 7                             |
| Pulses                          | 4          | 45                            | 122                           |
| Fruits and<br>Vegetables        | 410        | 512                           | 612                           |
| Nuts and Seeds                  | 8          | 24                            | 58                            |
| Total                           | 356        | 426                           | 328                           |

**Swedish Meatballs 2020**

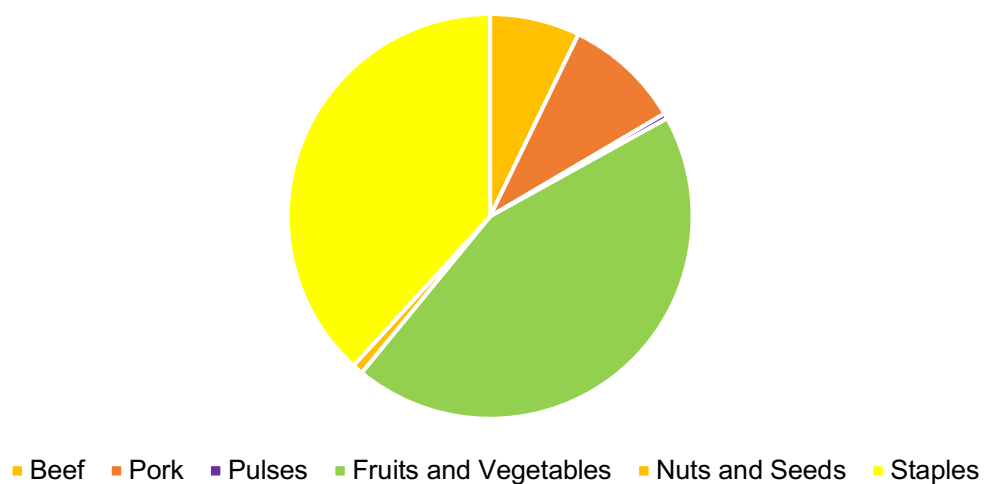

**Supplementary Figure 4a: Swedish meatballs 2020 protein food items based on national food consumption**

### Swedish Meatballs 2030

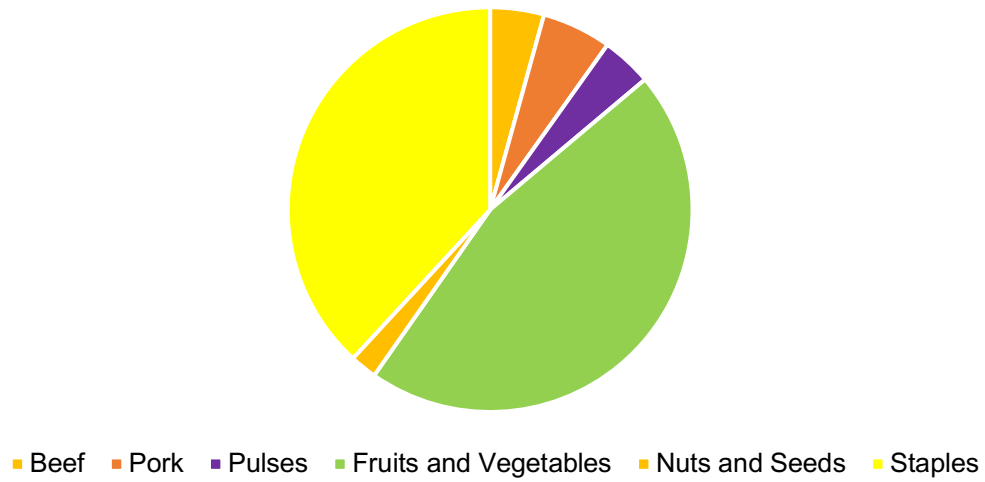

**Supplementary Figure 4b: Swedish meatballs 2030 protein food items based on national food consumption**

### Swedish Meatballs 2050

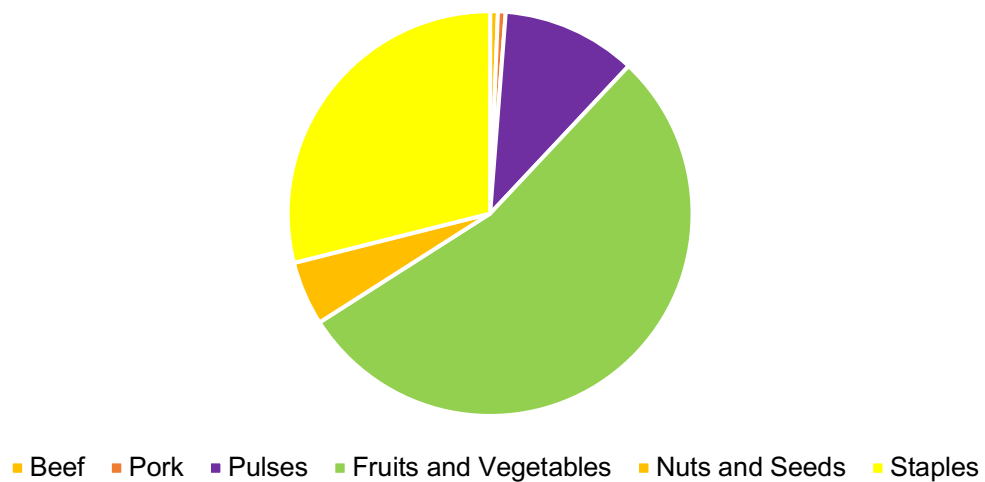

**Supplementary Figure 4c: Swedish meatballs 2050 protein food items based on national food consumption**

12.5. UK

**Supplementary Table 3: UK Chicken korma ingredient changes 2020 to 2050 based on national food consumption (g/cap/day)**

| Recipe: Chicken Korma | Amount (g) | 2030 Amount (g) calculated | 2050 Amount (g) calculated |
|-----------------------|------------|----------------------------|----------------------------|
| Chicken               | 76         | 60                         | 23                         |
| Fruit and veg         | 450        | 512                        | 612                        |
| Rice                  | 452        | 426                        | 328                        |
| Pulses                | 7          | 45                         | 122                        |
| Total                 | 979        | 997                        | 1087                       |

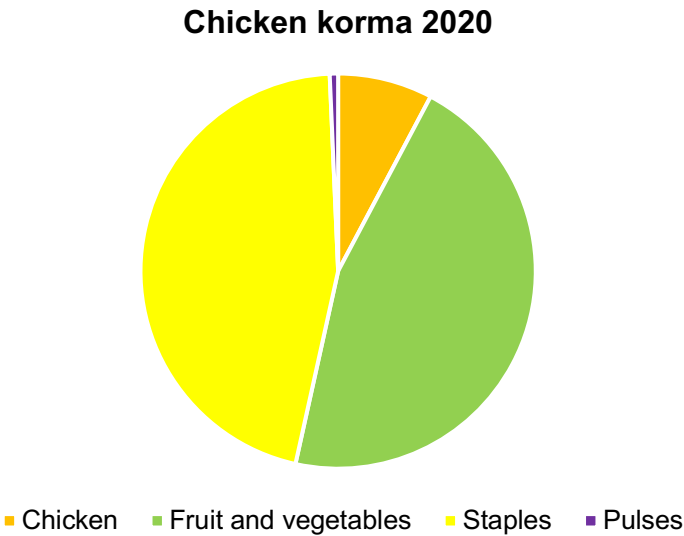

**Supplementary Figure 5a: UK Chicken Korma 2020 protein food items based on national food consumption**

**Chicken korma 2030**

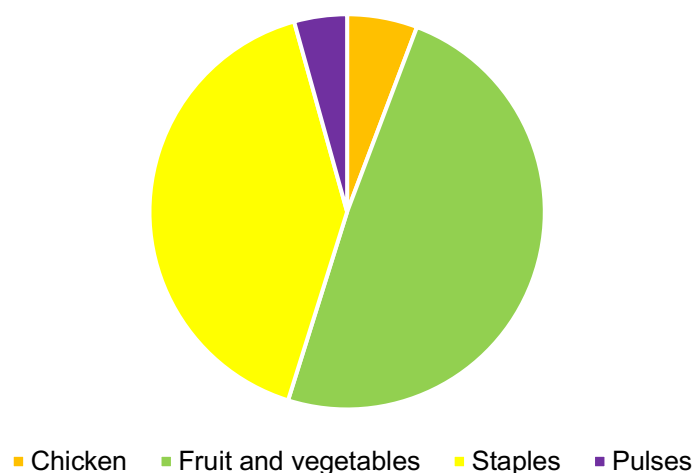

**Supplementary Figure 5b: UK Chicken Korma 2030 protein food items based on national food consumption**

**Chicken korma 2050**

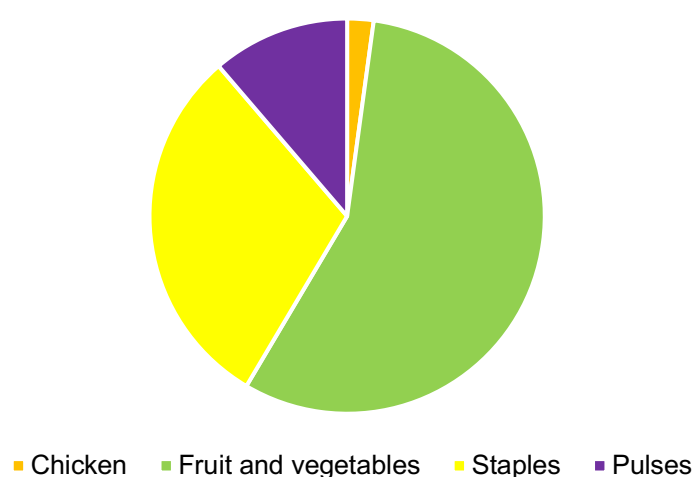

**Supplementary Figure 5c: UK Chicken Korma 2050 protein food items based on national food consumption**

### 13. Captions:

Supplementary data file S1: FAO 2019 WEU  
Supplementary data file S2: FAO 2019 Sweden  
Supplementary data file S3: FAO 2019 UK  
Supplementary data file S4: IMAGE Brazil  
Supplementary data file S5: IMAGE China  
Supplementary data file S6: IMAGE Sweden  
Supplementary data file S7: IMAGE UK

The FAO files contain g/cap/day data for all protein food items, and the 6 main food categories. In addition the UK and Sweden files contain the downscaling calculations from Western Europe (WEU).



The IMAGE files contain food consumption (g/cap/day) for all protein food items, and the 6 main food categories. In addition, they contain monthly servings calculations, change ratios for the period 2020 to 2050, three examples of mixed dish calculations for 2020, 2030, 2040 and 2050.

## 14. References

1. CIA. *The World Factbook - Brazil*. 2022 [cited 2022 23.8.22]; Available from: <https://www.cia.gov/the-world-factbook/countries/brazil/>.
2. Carbon Brief. *The Carbon Brief Profile: Brazil*. 2018 [cited 2022 14.9.22]; Available from: <https://www.carbonbrief.org/the-carbon-brief-profile-brazil/>.
3. WBCSD. *Sustainable Lifestyles Report China*. 2015 [cited 2022 22.8.22]; Available from: <https://www.wbcsd.org/contentwbc/download/465/5058/1>.
4. Amigofoods.com. *Feijoada, Brazilian Black Bean Stew*. 2022 [cited 2022 23.8.22]; Available from: <https://blog.amigofoods.com/index.php/brazilian-foods/feijoada-brazilian-black-bean-food/>.
5. Deliza, R. and L. Casotti, 18 - *Brazilian meals*, in *Meals in Science and Practice*, H.L. Meiselman, Editor. 2009, Woodhead Publishing. p. 377-393.
6. Li, B., et al., *The contribution of China's emissions to global climate forcing*. *Nature*, 2016. **531**(7594): p. 357-361.
7. Xiong, X., et al., *How urbanization and ecological conditions affect urban diet-linked GHG emissions: New evidence from China*. *Resources, Conservation and Recycling*, 2022. **176**: p. 105903.
8. Ma, G., *Food, eating behavior, and culture in Chinese society*. *Journal of Ethnic Foods*, 2015. **2**(4): p. 195-199.
9. Mao, Y., et al., *Consumption Patterns and Consumer Attitudes to Beef and Sheep Meat in China*. *American Journal of Food and Nutrition*, 2016. **4**(2): p. 30-39.
10. conorbofin.com. *Sweet and sour pork with pineapple*. 2022 [cited 2022 23.0.22]; Available from: <https://conorbofin.com/2015/10/20/chinese-truck-drivers-sweet-and-sour-pork-with-pineapple/>.
11. www.chineserecipes.com. *Kung Poa Chicken*. 2022 [cited 2022 23.9.22]; Available from: <https://www.chineserecipes.com/poultry/classic-kung-pao-chicken>.
12. www.myrecipes.com, *Chinese Hot Pot of Beef and Vegetables*. 2022.
13. BBC Good Food. *Peking duck*. 2022 [cited 2022 27.9.22]; Available from: <https://www.bbcgoodfood.com/recipes/peking-duck>.
14. CIA. *The World Factbook - Sweden*. 2022 [cited 2022 23.8.22]; Available from: <https://www.cia.gov/the-world-factbook/countries/sweden/>.
15. World Economics. *UK's Methane Emissions*. 2022 [cited 2022 23.9.22]; Available from: <https://www.worldconomics.com/ESG/Environment/Methane-Emissions/United Kingdom.aspx>.
16. Swedish Board of Agriculture (Jordbruksverket). *Consumption of meat*. 2022 [cited 2022 23.9.22]; Available from: <https://jordbruksverket.se/mat-och-drycker/hallbar-produktion-och-konsumtion-av-mat/konsumtion-av-kott>.
17. Swedish Food Agency (Livsmedelsverket). *Eating habits and dietary guidelines*. 2022 [cited 2022 22.9.22]; Available from: <https://www.livsmedelsverket.se/en/food-habits-health-and-environment/dietary-guidelines>.
18. Åsa Brugård Konde, R.B., Lina Haglund, Anette Jansson, Monika Pearson, and Jorun Sanner Färnstrand and Anna-Karin Johansson. *Swedish dietary guidelines - risk and benefit management report*. Rapport 5 2015 2015 [cited 2021 8.2.21]; Available from: <https://www.livsmedelsverket.se/globalassets/publikationsdatabas/rapporter/2015/rapp-hanteringsrapport-engelska-omslag--inlaga--bilagor-eng-version.pdf>.
19. Spendrup, S. and H.P. Hovmalm, *Consumer attitudes and beliefs towards plant-based food in different degrees of processing – The case of Sweden*. *Food Quality and Preference*, 2022. **102**.

20. BBC Good Food. *Swedish Meatballs*. 2022 [cited 2022 23.9.22]; Available from: <https://www.bbcgoodfood.com/recipes/swedish-meatballs>
21. www.yummly.co.uk. *Swedish kalops*. 2022; Available from: <https://www.yummly.co.uk/recipe/Swedish-Kalops-2600186?prm-v1>.
22. cookieandkate.com. *Lentil and mushroom meatballs*. 2022 [cited 2022 27.9.22]; Available from: <https://cookieandkate.com/lentil-and-mushroom-meatballs/>.
23. CIA. *The World Factbook - UK*. 2022 [cited 2022 23.8.22]; Available from: <https://www.cia.gov/the-world-factbook/countries/united-kingdom/>.
24. Stewart, C., et al., *Trends in UK meat consumption: analysis of data from years 1–11 (2008–09 to 2018–19) of the National Diet and Nutrition Survey rolling programme*. The Lancet Planetary Health, 2021. **5**(10): p. e699–e708.
25. Castelow, E. *Food in Britain in the 1950s and 1960s*. 2022 [cited 2022 28.9.22]; Available from: <https://www.historic-uk.com/CultureUK/Food-in-Britain-in-the-1950s-1960s/>.
26. NHS Digital. *Statistics on Obesity, Physical Activity and Diet, England, 2020. Highlights*. 2020 [cited 2022 28.9.22]; Available from: <https://digital.nhs.uk/data-and-information/publications/statistical/statistics-on-obesity-physical-activity-and-diet/england-2020#highlights>.
27. Willett, W., et al., *Food in the Anthropocene: the EAT–Lancet Commission on healthy diets from sustainable food systems*. The Lancet, 2019. **393**(10170): p. 447–492.
28. BBC Good Food. *Chicken korma*. 2022 [cited 2022 23.9.22]; Available from: <https://www.bbcgoodfood.com/recipes/easy-chicken-korma>.
29. <https://realfood.tesco.com>. *Chicken and tomato spiced curry*. 2022 [cited 2022 23.9.22]; Available from: <https://realfood.tesco.com/recipes/chicken-and-tomato-spiced-curry.html>.
30. Bailey, G., *Britain's 20 favourite meals revealed in every decade from 1960s to now*, in *Mirror*. 2018.
31. Richmond, S., *Brits' Top 20 family recipes handed down through generations as pearls of wisdom*, in *Mirror*. 2021.
32. Bijl, D.L., Bogaart, P.W., Dekker, Stefan C., Stehfest, Elke, de Vries, Bert J. M., van Vuuren, Detlef P., *A physically-based model of long-term food demand*. Global Environmental Change, 2017. **45**: p. 47–62.
33. FAO. *New Food Balances*. 2020 [cited 2020 12.10.20]; Available from: <http://www.fao.org/faostat/en/#data/FBS/>.
34. van Vuuren, D.P., et al., *Alternative pathways to the 1.5 °C target reduce the need for negative emission technologies*. Nature Climate Change, 2018. **8**(5): p. 391–397.
35. FAOSTAT. *New Food Balances. Description of utilization variables*. 2020 [cited 2020 9.10.20]; Available from: <http://fenixservices.fao.org/faostat/static/documents/FBS/New%20FBS%20methodology.pdf>.
36. Kummu, M., et al., *Lost food, wasted resources: Global food supply chain losses and their impacts on freshwater, cropland, and fertiliser use*. Science of The Total Environment, 2012. **438**: p. 477–489.
37. British Nutrition Foundation. *Your Balanced Diet*. 2021 [cited 2021 15.11.21]; Available from: [https://www.nutrition.org.uk/media/ohunys2u/your-balanced-diet\\_16pp\\_final\\_web.pdf](https://www.nutrition.org.uk/media/ohunys2u/your-balanced-diet_16pp_final_web.pdf).
38. Braziliankitchenabroad.com. *Brazilian chicken stew*. 2022 [cited 2022 23.9.22]; Available from: <https://braziliankitchenabroad.com/brazilian-stew-chicken-recipe/>.
39. oliviascuisine.com. *Feijão Tropeiro (Brazilian Beans with Sausage and Collard Greens)*. 2022 [cited 2022 28.9.22]; Available from: <https://www.oliviascuisine.com/feijao-tropeiro/>.
40. Braziliankitchenabroad.com. *Baked chicken legs*. 2022 [cited 2022 23.9.22]; Available from: <https://braziliankitchenabroad.com/baked-chicken-legs-recipe/>.

41. food.com. *Brazilian Churrasco Brazilian Barbecued Beef*. 2022 [cited 2022 27.9.22]; Available from: <https://www.food.com/recipe/brazilian-churrasco-brazilian-barbecued-beef-210897>.
42. baconismagic.ca. *Vegetarian feijoada*,. 2022 [cited 2022 27.9.22]; Available from: <https://www.baconismagic.ca/brazil/vegetarian-feijoada/>.
43. www.chineserecipes.com. *Crispy orange beef*. 2022 [cited 2022 23.9.22]; Available from: <https://www.chineserecipes.com/beef/crispy-orange-beef>.
44. www.chineserecipes.com. *Fried Tofu and Vegetables*. 2022 [cited 2022 23.9.22]; Available from: <https://www.chineserecipes.com/vegetarian/fried-tofu-and-vegetables>.
45. swedishfood.com. *Sausage stroganoff (Korvstroganoff)*. 2022 [cited 2022 28.9.22]; Available from: <https://swedishfood.com/swedish-food-recipes-main-courses/97-sausage-stroganoff>.
46. abelandcole.co.uk. *Swedish Chicken with Mushrooms & Cream*. 2022 [cited 2022 28.9.22]; Available from: <https://www.abelandcole.co.uk/recipes/swedish-chicken-with-mushrooms-cream>.
47. swedishfood.com. *Steak on a plank (Plankstek)*. 2022 [cited 2022 28.9.22]; Available from: <https://swedishfood.com/swedish-food-recipes-main-courses/460-plankstek>.
48. www.sainsburys.co.uk. *Spaghetti Bolognese*. 2022 [cited 2022 28.9.22]; Available from: <https://www.sainsburys.co.uk/gol-ui/recipes/perfect-spaghetti-bolognese>.
49. www.sainsburys.co.uk. *Full English Breakfast*. 2022 [cited 2022 28.9.22]; Available from: <https://www.sainsburys.co.uk/gol-ui/recipes/full-english-breakfast>.
50. BBC Good Food. *Easy roast beef*. 2022 [cited 2022 27.9.22]; Available from: <https://www.bbcgoodfood.com/recipes/roast-beef-carrots-easy-gravy>.
51. BBC Good Food. *Yorkshire puddings*. 2022 [cited 2022 27.9.22]; Available from: <https://www.bbcgoodfood.com/recipes/best-yorkshire-puddings>.
52. <https://realfood.tesco.com>. *Roast beef and Yorkshire pudding*. 2022 [cited 2022 23.9.22]; Available from: <https://realfood.tesco.com/recipes/roast-beef-and-yorkshire-puddings.html>.
53. BBC Good Food. *Roast chicken*. 2022 [cited 2022 23.9.22]; Available from: <https://www.bbcgoodfood.com/recipes/classic-roast-chicken-gravy>.
54. BBC Good Food. *Vegetarian bolognese*. 2022 [cited 2022 23.9.22]; Available from: [https://www.bbc.co.uk/food/recipes/puy\\_lentil\\_bolognaise\\_40407](https://www.bbc.co.uk/food/recipes/puy_lentil_bolognaise_40407).
