# Supplementary material for: From future diets to dishes: communicating dietary shift associated with a 1.5°C scenario for Brazil, China, Sweden and the United Kingdom
Source: Frontiers journal article supplement (doi:10.3389/fsufs.2023.1266708), 2023-11-27
Supplement: Table_1.XLSX [file Table_1.XLSX]

## Sheet: WEU 18+ 8 
WEU 2019 FAO		FAOSTAT 2019 data (1000t/yr))	FAOSTAT Pop (2019) 1000 persons	FAOSTAT 2019 (g/cap/day)
Total (all 18 countries)		370663	423611	2397.28
WEU 8 (calculated t/yr)		637	709.647	2459.26
Total (26 countries)		371300	424320	2397.28
			0.167523

## Sheet: IMAGE WEU 2020
	IMAGE WEU 2020 (g/cap/day)
Total	2526.89

## Sheet: WEU 18
WEU (18) 2019 FAO		FAOSTAT 2019 data (1000t/yr))	FAOSTAT Pop (2019) 1000 persons	FAOSTAT (g/cap/day)
Total		370026	422901	2397.18

## Sheet: WEU 8
WEU (8) 2019 FAO		FAOSTAT 2019 data (1000t/yr))	FAOSTAT Pop (2019) 1000 persons	FAOSTAT (g/cap/day)
Total		637	709.647	2459.26

## Sheet: Calculations
	FAOSTAT 2019 (g/cap/day)	IMAGE WEU 2020 (g/cap/day)	Difference
WEU	2397.28	2526.89	-129.612	-5.12928
Brazil	2105	2067	38	1.83841
China	2706	2406	300	12.4688

## Sheet: README
Source:	FBS 2019 including population				FAO 2019 food supply data for countries with FAO data							FAO food supply data (t/yr) extracted from FAOSTAT Food Balance sheets					https://www.fao.org/faostat/en/#data/FBSH
	FBS 2018 population for WEU 8											New Food Balances (2014 onwards)
	See FAO WEU 8 minor countries 2019 summary.xls for the caluclation of the total food supply for the 8 minor countries
	FAO food supply data (t/yr) extracted from FAOSTAT Food Balance sheets					https://www.fao.org/faostat/en/#data/FBSH
	New Food Balances (2014 onwards)					Selected all items and elements including population for country/region of interest for selected year
	See the Calculations for calculations of the average food supply (g/cap/day) for all the countries in the IMAGE Western Europe (WEU) region
	See IMAGE WEU 2020 data in the IMAGE folder
